# Supplementary material for: Molecular Cloning, Structural Analysis and Tissue Expression of Protein Phosphatase 3 Catalytic Subunit Alpha Isoform (PPP3CA) Gene in Tianfu Goat Muscle
Source: PubMed Central journal article supplement (PMC3958854; doi:10.3390/ijms15022346), 2014-02-07
Supplement: ijms-15-02346-s001.pdf [file ijms-15-02346-s001.pdf]

## Supplementary Information

### Tianfu goat-nucleotide sequence

ATGTCCGAGCCCAAGGCAATTGATCCCAAGTTGTCGACGACCGACAGGGTGGTGAAAGCT  
GTCCCATTTCTCCAAGTCACCGGCTTACGGCAAAAGAAGTGTTTGATAACGATGGGAAAC  
CTCGTGTGGATATCTTAAAGGCACATCTCATGAAGGAGGGCAGGCTCGAAGAGACTGTCGC  
ATTGAGAATAATAACAGAGGGGGCTTCAATTCTTCGACAGGAAAAAACTTGCTGGATATT  
GATGCTCCAGTCACAGTTTGTGGGGACATCCATGGACAATTCTTTGACTTGATGAAACTCTT  
TGAAGTGGGGGGATCTCCTGCCAACACTCGCTACCTCTTCTTAGGGGACTATGTTGACAGA  
GGGTACTTCAGTATCGAATGTGTGCTGTATTTGTGGGCTTTGAAAATTCTTTACCCCAAAC  
ACTGTTTTTACTTCGTGGAAATCATGAATGTAGACATCTAACAGAGTATTTACATTTAAAC  
AAGAATGTAATAAAGTATTCAGAACGTGTATATGATGCCTGCATGGATGCCTTTGACTGC  
CTGCCCTGGCTGCCCTGATGAACCAGCAGTTCCTGTGTGTACACGGCGGTTTGTCTCCAG  
AGATAAACACTTTAGATGATATCAGAAAATTAGACCGATTCAAAGAACCACCTGCTTATGGA  
CCTATGTGTGATATCCTGTGGTCAGACCCGCTGGAAGATTTTGGAAATGAGAAGACTCAGG  
AACATTTCACTCACAACACAGTCAGGGGCTGTTCATACTTCTACAGTTACCCGGCTGTATGT  
GAATTCTTGCAGCACAATAACTTGTTATCTATCCTCCGAGCTCACGAAGCCCAAGATGCAG  
GGTACCGCATGTACAGGAAAAGCCAAACAACAGGCTTCCTTCTCTCATTACAATTTTTTC  
AGCACCAAATTACTTAGATGTATAACAATAACAAGCTGCAGTATTGAAGTATGAGAACAATG  
TCATGAATATCAGGCAATTCAACTGTTCTCCTCATCCATACTGGCTTCCAAATTTTCATGGATG  
TTTTACCTGGTCCCTGCCATTTGTTGGGGAAAAAGTGACTGAGATGCTGGTAAATGTCCT  
CAACATCTGCTCAGACGATGAACTGGGGTCAGAAGAAGATGGATTTGATGGAGCAACGGC  
TGCGGCCAGGAAGGAGGTGATAAGAAATAAGATCCGAGCCATCGGCAAGATGGCCAGAGT  
GTTCTCGTTCTCAGAGAAGAGAGTGAAAGTGTGCTGACGCTGAAAGGCCTGACGCCAC  
AGGCATGCTCCCCAGCGCGTGCTTTCTGGAGGGAAACAAACCCTGCAAAGCGCTATCAA  
AGGATTTTCACCACAACATAAGATCACTAGCTTCGAGGAGGCCAAGGGCTTAGACCGAATT  
AACGAGAGGATGCCGCCTCGCAGAGATGCCATGCCCTCTGACGCCAACCTTAACTCCATCA  
ACAAGGCTCTCGCCTCAGAGACTAACGGCACGGACAGCAATGGCAGTAATAGCAGCAATA  
TCCAGTGA

### Tianfu goat-amino acid sequence

MSEPKAIDPKLSTDRVVKAVPFPPSHRLTAKEVFDNDGKPRVDILKAHLMKEGRLEETV  
ALRIITEGASILRQEKNLLDIDAPVTVCEDIHQFFDLMKLFVGGSPANTRYLFLGDYV  
DRGYFSIECVLYLWALKILYPKTLFLLRGNHECRHLTEYFTFKQECKIKYSERVYDACMD  
AFDCLPLAALMNQQFLCVHGGLSPEINTLDDIRKLDRFKEPPAYGPMCDILWSDPLEDFG  
NEKTQEHFTHNTVRGCSYFYSYPAVCEFLQHNNLLSILRAHEAQDAGYRMYRKSQTTGFP  
SLITIFSAPNYLDVYNNKA AVLKYENNVMNIRQFNCSHPYWLPNFMDVFTWSLPFVGEK  
VTEMLVNVLNICSDDELGSEEDGFDGATAAARKEVIRNKIRAIGKMARVFSVLREESV  
LTLKGLTPTGMLPSGVLSGGKQTLQSAIKGFSPQHKITSFEEAKGLDRINERMPPRRDAM  
PSDANLNSINKALASETNGTDSNGSNSSNIQ
